# Supplementary material for: Early life socioeconomic position and mortality from cardiovascular diseases: an application of causal mediation analysis in the Stockholm Public Health Cohort
Source: PubMed Central journal article supplement — BMJ Open. 2021 Jul 1;9(6):e026258. doi: 10.1136/bmjopen-2018-026258 (PMC6588973; doi:10.1136/bmjopen-2018-026258), 2021-07-01
Supplement: bmjopen-2018-026258supp002.pdf [file bmjopen-2018-026258supp002.pdf]

Supplementary file 2

**eTable 2.** Gender-stratified mediation of the associations between father's SEP and CVD mortality by social and behavioral risk factors, The Stockholm Public Health Cohort

|                                    | <b>Men</b><br>(n=9075; 349 deaths) | <b>Women</b><br>(n=10 539; 390 deaths) |
|------------------------------------|------------------------------------|----------------------------------------|
| <b>IOW Approach</b>                | IRR (95% CI <sup>4</sup> )         | IRR (95% CI <sup>4</sup> )             |
| Total effect <sup>1</sup>          | 1.32 (1.09-1.57)                   | 1.17 (0.98-1.42)                       |
| Natural direct effect <sup>2</sup> | 1.24 (1.00-1.52)                   | 1.06 (0.86-1.31)                       |
| Natural indirect effect            | 1.07 (0.99-1.15)                   | 1.10 (1.03-1.17)                       |
| Proportion mediated <sup>5</sup>   | 27%                                | 64%                                    |
| <b>Traditional Approach</b>        |                                    |                                        |
| Total effect <sup>1</sup>          | 1.32 (1.09-1.57)                   | 1.17 (0.98-1.42)                       |
| Direct effect <sup>3</sup>         | 1.19 (0.97-1.43)                   | 1.02 (0.84-1.25)                       |
| Indirect effect                    | 1. 12 (1.04-1.20)                  | 1.15 (1.07-1.22)                       |
| Proportion mediated <sup>5</sup>   | 48%                                | 88%                                    |

**Note:** SEP = Socio-economic Position; CVD = Cardio-vascular Diseases; IRR = Incidence Rate Ratio; CI = Confidence Interval; IOW= Inverse Odds Weighting

<sup>1</sup>Adjusted for age, country of birth, and marital status.

<sup>2</sup>Obtained by applying the inverse odds weights, in addition to adjusting for age, country of birth, and marital status.

<sup>3</sup>Adjusted for age, country of birth, marital status, and the whole set of mediators.

<sup>4</sup> Percentile-based bootstrap confidence intervals are reported.

<sup>5</sup>The proportion mediated was calculated using the formula:  $\{IRR^{NDE} (IRR^{NIE} - 1)/(IRR^{NDE} * IRR^{NIE} - 1)\} * 100$ .
