# Supplementary material for: Early life socioeconomic position and mortality from cardiovascular diseases: an application of causal mediation analysis in the Stockholm Public Health Cohort
Source: PubMed Central journal article supplement — BMJ Open. 2021 Jul 1;9(6):e026258. doi: 10.1136/bmjopen-2018-026258 (PMC6588973; doi:10.1136/bmjopen-2018-026258), 2021-07-01
Supplement: bmjopen-2018-026258supp003.pdf [file bmjopen-2018-026258supp003.pdf]

Supplementary file 3

**eTable 3.** Mediation of the associations between father's SEP and CVD mortality by social and behavioral risk factors after excluding the farmers and the self-employed from the group of nonmanual fathers, The Stockholm Public Health Cohort (n=17 417))

| <b>IOW Approach</b>                | <b>Mediation by education and adult SEP</b> | <b>Mediation by education, adult SEP + behavioral factors</b> |
|------------------------------------|---------------------------------------------|---------------------------------------------------------------|
|                                    | IRR (95% CI <sup>4</sup> )                  | IRR (95% CI <sup>4</sup> )                                    |
| Total effect <sup>1</sup>          | 1.23 (1.08-1.42)                            | 1.23 (1.08-1.42)                                              |
| Natural direct effect <sup>2</sup> | 1.15 (0.97-1.40)                            | 1.12 (0.96-1.32)                                              |
| Natural indirect effect            | 1.06 (1.01-1.13)                            | 1.10 (1.03-1.16)                                              |
| Proportion mediated <sup>5</sup>   | 32%                                         | 48%                                                           |
| <b>Traditional Approach</b>        |                                             |                                                               |
| Total effect <sup>1</sup>          | 1.23 (1.07-1.44)                            | 1.23 (1.07-1.44)                                              |
| Direct effect <sup>3</sup>         | 1.10 (0.94-1.33)                            | 1.08 (0.93-1.27)                                              |
| Indirect effect                    | 1.12 (1.07-1.17)                            | 1.14 (1.08-1.21)                                              |
| Proportion mediated <sup>5</sup>   | 57%                                         | 65%                                                           |

**Note:** SEP = Socio-economic Position; CVD = Cardio-vascular Diseases; IRR = Incidence Rate Ratio; CI = Confidence Interval; IOW= Inverse Odds Weighting

<sup>1</sup>Adjusted for age, gender, country of birth, and marital status

<sup>2</sup>Obtained by applying the inverse odds weights, in addition to adjusting for age, gender, country of birth, and marital status

<sup>3</sup>Adjusted for age, gender, country of birth, marital status, and the mediators of interest.

<sup>4</sup> Percentile-based bootstrap confidence intervals are reported.

<sup>5</sup>The proportion mediated was calculated using the formula:  $\{IRR^{NDE} (IRR^{NIE} - 1)/(IRR^{NDE} * IRR^{NIE} - 1)\} * 100$ .
