# Supplementary material for: Early life socioeconomic position and mortality from cardiovascular diseases: an application of causal mediation analysis in the Stockholm Public Health Cohort
Source: PubMed Central journal article supplement — BMJ Open. 2021 Jul 1;9(6):e026258. doi: 10.1136/bmjopen-2018-026258 (PMC6588973; doi:10.1136/bmjopen-2018-026258), 2021-07-01
Supplement: bmjopen-2018-026258supp004.pdf [file bmjopen-2018-026258supp004.pdf]

Supplementary file 4

**eTable 4.** Proportion of missing observations for each study variable, the Stockholm Public Health Cohort

| <b>Study variables</b> | <b>Missing</b> |             |
|------------------------|----------------|-------------|
|                        | <b>n</b>       | <b>%</b>    |
| Age                    | 0              | 0           |
| Gender                 | 106            | 0.5         |
| Country of origin      | 0              | 0           |
| Marital status         | 0              | 0           |
| Father's SEP           | 2030           | 10.0        |
| Educational attainment | 69             | 0.4         |
| Adult SEP              | 1046           | 5.3         |
| Smoking                | 177            | 0.9         |
| Risky alcohol drinking | 928            | 4.7         |
| Physical activity      | 771            | 3.9         |
| Poor diet              | 421            | 2.1         |
| Body mass index        | 460            | 2.3         |
| <b>Total</b>           | <b>4633</b>    | <b>23.5</b> |
