# Supplementary material for: Early life socioeconomic position and mortality from cardiovascular diseases: an application of causal mediation analysis in the Stockholm Public Health Cohort
Source: PubMed Central journal article supplement — BMJ Open. 2021 Jul 1;9(6):e026258. doi: 10.1136/bmjopen-2018-026258 (PMC6588973; doi:10.1136/bmjopen-2018-026258), 2021-07-01
Supplement: bmjopen-2018-026258supp005.pdf [file bmjopen-2018-026258supp005.pdf]

## Supplementary file 5

| <b>eTable 5.</b> Distribution of missing and complete data across the study variables, the Stockholm Public Health Cohort |                                 |                                  |                            |
|---------------------------------------------------------------------------------------------------------------------------|---------------------------------|----------------------------------|----------------------------|
| <b>Study variables</b>                                                                                                    | <b>Missing data<sup>1</sup></b> | <b>Complete data<sup>2</sup></b> | <b>P-value<sup>3</sup></b> |
| <b>N (%)</b>                                                                                                              | 4633 (23.5)                     | 15087 (76.5)                     |                            |
| <b>Age, mean (SD)</b>                                                                                                     | 61.6 (13.1)                     | 57.2 (11.2)                      | <0.001                     |
| <b>Gender</b>                                                                                                             |                                 |                                  | <0.01                      |
| Men                                                                                                                       | 44.9                            | 46.7                             |                            |
| Women                                                                                                                     | 55.1                            | 53.3                             |                            |
| <b>Country of origin</b>                                                                                                  |                                 |                                  | <0.001                     |
| Sweden                                                                                                                    | 72.7                            | 84.5                             |                            |
| Nordic                                                                                                                    | 9.6                             | 7.3                              |                            |
| Other                                                                                                                     | 17.7                            | 8.2                              |                            |
| <b>Marital status</b>                                                                                                     |                                 |                                  |                            |
| Married                                                                                                                   | 53.7                            | 60.1                             |                            |
| Single/divorced/widowed                                                                                                   | 46.3                            | 39.9                             |                            |
| <b>Father's SEP</b>                                                                                                       |                                 |                                  | <0.001                     |
| Nonmanual                                                                                                                 | 51.9                            | 53.9                             |                            |
| Manual                                                                                                                    | 48.1                            | 46.1                             |                            |
| <b>Educational attainment</b>                                                                                             |                                 |                                  | <0.001                     |
| High                                                                                                                      | 22.1                            | 36.8                             |                            |
| Medium                                                                                                                    | 33.7                            | 38.9                             |                            |
| Low                                                                                                                       | 44.2                            | 24.3                             |                            |
| <b>Adult SEP</b>                                                                                                          |                                 |                                  | <0.001                     |
| Nonmanual                                                                                                                 | 53.0                            | 64.4                             |                            |
| Manual                                                                                                                    | 40.6                            | 27.0                             |                            |
| Other                                                                                                                     | 6.4                             | 8.6                              |                            |
| <b>Smoking</b>                                                                                                            |                                 |                                  | <0.001                     |
| Never smokers                                                                                                             | 50.3                            | 46.8                             |                            |
| Current smokers                                                                                                           | 20.2                            | 17.6                             |                            |
| Former smokers                                                                                                            | 29.5                            | 35.6                             |                            |
| <b>Risky alcohol drinking</b>                                                                                             |                                 |                                  | <0.001                     |
| No                                                                                                                        | 66.1                            | 78.4                             |                            |
| Yes                                                                                                                       | 33.9                            | 21.6                             |                            |
| <b>Physical inactivity</b>                                                                                                |                                 |                                  | <0.001                     |
| Active                                                                                                                    | 10.1                            | 11.4                             |                            |
| Moderately active                                                                                                         | 15.8                            | 21.3                             |                            |
| Slightly active                                                                                                           | 51.4                            | 52.4                             |                            |
| Inactive                                                                                                                  | 22.7                            | 14.9                             |                            |
| <b>Diet (Fruits and berries)</b>                                                                                          |                                 |                                  | <0.001                     |
| More than once a day                                                                                                      | 19.0                            | 22.9                             |                            |
| Almost daily/a few times a week                                                                                           | 66.1                            | 64.4                             |                            |
| Once a week or less                                                                                                       | 14.9                            | 12.7                             |                            |
| <b>Body Mass Index</b>                                                                                                    |                                 |                                  | <0.001                     |
| Underweight                                                                                                               | 2.0                             | 1.1                              |                            |
| Normal weight                                                                                                             | 46.7                            | 49.8                             |                            |
| Overweight                                                                                                                | 38.5                            | 38.6                             |                            |
| Obese                                                                                                                     | 12.8                            | 10.5                             |                            |

---

<sup>1</sup>The sample with data missing on any of the study variables. <sup>2</sup>The sample with complete data on all study variables. <sup>3</sup>T-test for age and chi-square test for all categorical variables

---
